# Supplementary material for: Cooperative adaptation to therapy (CAT) confers resistance in heterogeneous non-small cell lung cancer
Source: PubMed Central journal article supplement (PMC6709889; doi:10.1371/journal.pcbi.1007278), 2019-08-26
Supplement: pcbi.1007278.s007.pdf [file pcbi.1007278.s007.pdf]

| Parameter | No Drug | Docetaxel | Bortezomib | Afatinib                |
|-----------|---------|-----------|------------|-------------------------|
| $l_1$     | 0.4756  | 0.4756    | 0.0699     | 0.5487                  |
| $l_2$     | 0.3694  | 0.3964    | 0.0058     | 0.0132                  |
| $K_{WT}$  | 47.62   | 250       | 14.35      | 1,000                   |
| $K_{M_2}$ | 250     | 1E6       | 452,693.53 | 28.82                   |
| $a_{12}$  | -       | 0.0015    | 0.2        | -0.0007                 |
| $a_{21}$  | -       | -0.0004   | 0.0285     | -0.0049                 |
| Error     | 0.7891  | 0.0031    | 1.519      | $2.1777 \times 10^{-7}$ |
