# Supplementary material for: Cooperative adaptation to therapy (CAT) confers resistance in heterogeneous non-small cell lung cancer
Source: PubMed Central journal article supplement (PMC6709889; doi:10.1371/journal.pcbi.1007278), 2019-08-26
Supplement: pcbi.1007278.s008.pdf [file pcbi.1007278.s008.pdf]

| Patient ID | Cancer Type                        | Cancer Stage | Anatomic Site of Specimen   |
|------------|------------------------------------|--------------|-----------------------------|
| MB-077     | Non-Small Cell Lung Cancer (NSCLC) | Metastatic   | Liver                       |
| MB-060     | Non-Small Cell Lung Cancer (NSCLC) | Metastatic   | Lung                        |
| MB-103     | Non-Small Cell Lung Cancer (NSCLC) | Metastatic   | Lung                        |
| MB-104     | Non-Small Cell Lung Cancer (NSCLC) | Stage IV     | Lung                        |
| MB-048     | Non-Small Cell Lung Cancer (NSCLC) | Stage IV     | Lung                        |
| MB-102     | Non-Small Cell Lung Cancer (NSCLC) | Metastatic   | Right abdominal wall nodule |
| MB-101     | Non-Small Cell Lung Cancer (NSCLC) | Metastatic   | Left abdominal wall nodule  |
| MB-003     | Non-Small Cell Lung Cancer (NSCLC) | Stage III    | Lung                        |
